# Supplementary material for: Microstructural impact of anodic coatings on the electrochemical chlorine evolution reaction
Source: Royal Society of Chemistry journal article supplement (doi:10.1039/c2cp41163f), 2012-01-01
Supplement: c2cp41163f.pdf [file c2cp41163f.pdf]

## Microstructural impact of anodic coatings on the electrochemical chlorine evolution reaction

Ruiyong Chen,<sup>‡a</sup> Vinh Trieu,<sup>a</sup> Aleksandar R. Zeradjanin,<sup>b</sup> Harald Natter,<sup>a</sup> Detre Teschner,<sup>c</sup>  
Jürgen Kintrup,<sup>d</sup> Andreas Bulan<sup>d</sup>, Wolfgang Schuhmann<sup>b</sup> and Rolf Hempelmann<sup>\*a</sup>

<sup>a</sup> Physical Chemistry, Saarland University, 66123 Saarbrücken, Germany.

E-mail: r.hempelmann@mx.uni-saarland.de

<sup>b</sup> Analytical Chemistry-Electroanalysis and Sensors, Ruhr-University Bochum,  
44780 Bochum, Germany

<sup>c</sup> Inorganic Chemistry, Fritz-Haber-Institute of the Max Planck Society, 14195 Berlin, Germany

<sup>d</sup> Bayer MaterialScience AG, 51368 Leverkusen, Germany

<sup>‡</sup>Current address: Institute of Nanotechnology, Karlsruhe Institute of Technology (KIT),  
76021 Karlsruhe, Germany

### Supplementary Information

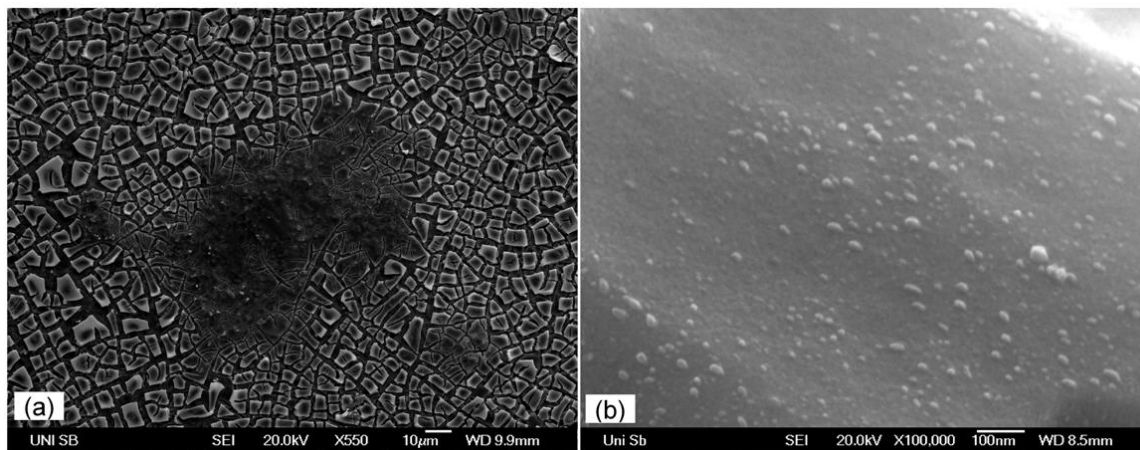

**Fig. S1** SEM images of (a) a commercial  $\text{Ru}_{0.3}\text{Ti}_{0.7}\text{O}_2$  coating, (b) a crack-free sol-gel  $\text{Ru}_{0.25}\text{Ti}_{0.75}\text{O}_2$  coating.<sup>1</sup>

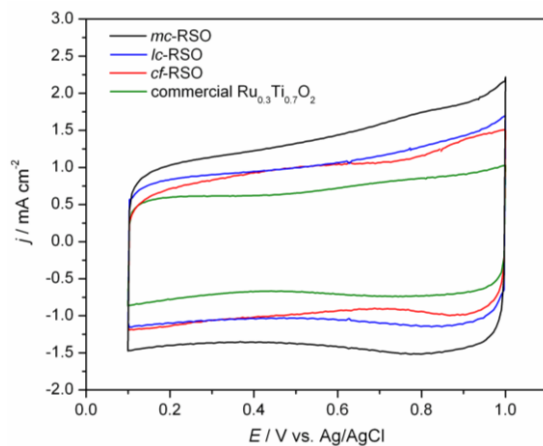

**Fig. S2** Cyclic voltammograms recorded with a potential scan rate of 50 mV s<sup>-1</sup> in 3.5 M NaCl, pH 3, at room temperature.

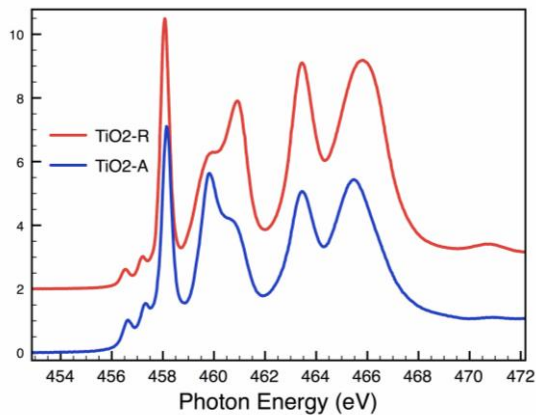

**Fig. S3** Ti *L*-edge X-ray absorption spectra of the rutile and anatase TiO<sub>2</sub> reference materials.

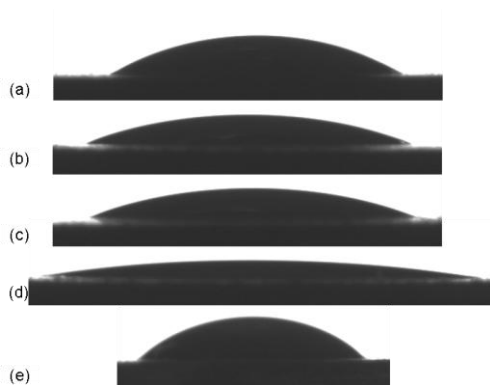

**Fig. S4** Contact angle measurements in air using a 20 μL water droplet showing the wettability of the coating surface. (a) *mc*-RSO, (b) *rc*-RSO, (c) *lc*-RSO, (d) *cf*-RSO, (e) commercial Ru<sub>0.3</sub>Ti<sub>0.7</sub>O<sub>2</sub> coating. For clarity, the water spreading on the surface is shown without rescaling the images.

**Table S1** XPS surface chemical analysis for the mud-crack  $\text{Ru}_{0.3}\text{Sn}_{0.7}\text{O}_2$  coating as-received and after electrochemical using.

| Kinetic energy / eV | Cl/(Ru + Sn) |       |
|---------------------|--------------|-------|
|                     | fresh        | used  |
| 200                 | 0.030        | 0.165 |
| 450                 | 0.041        | 0.120 |
| 700                 | 0.028        | 0.066 |

**Reference:**

- 1 R. Chen, V. Trieu, H. Natter, R. Hempelmann, A. Bulan, J. Kintrup and R. Weber, DE102010043085.4, 2010.
